# Supplementary material
Source: MDPI journal article supplement (https://www.mdpi.com/2075-4701/8/7/517)
Supplement: s1 [file s1]

**Supporting Materials**  
**Calix[4]arene-Based Amino Extractants Containing *n*-Alkyl**  
**Moieties for Separation of Pd(II) and Pt(IV) from Leach**  
**Liquors of Automotive Catalysts**

Manabu Yamada <sup>1,\*</sup>, Yu Kaneta <sup>2</sup>, Muniyappan Rajiv Gandhi <sup>3</sup>, Kunda Uma Maheswara  
Rao, <sup>1</sup> and Atsushi Shibayama <sup>3</sup>

<sup>1</sup> Research Center of Advanced Materials for Breakthrough Technology, Graduate School of Engineering Science, Akita University, 1-1 Tegatagakuen-machi, Akita 010-8502, Japan.

<sup>2</sup> Department of Life Science, Graduate School of Engineering Science, Akita University, 1-1 Tegatagakuen-machi, Akita 010-8502, Japan.

<sup>3</sup> Graduate School of International Resource Sciences, Akita University, 1-1 Tegatagakuen-machi, Akita 010-8502, Japan.

\*Corresponding Author: Tel +81-18-889-3068; Fax +81-18-889-3068; e-mail: myamada@gipc.akita-u.ac.jp

## Contents

**Table S1.** The concentrations of metal ions in the leached liquors of automotive catalysts after 25-times dilution.

**Figure S1** Effects of contact time on the extraction of (a) Pd(II), (b) Pt(IV), and (c) Rh(III) by extractants **3–5**.

**Figure S2** Comparative study of three platinum group metals (PGM) extractabilities from each single-component PGM solution using macrocyclic **5** and acyclic **6**.

**Figure S3** Log–log plot by varying concentration of extractants **3–5** on Pd(II) extraction.

**Figure S4** Log–log plot by varying concentration of extractants **3–5** on Pt(IV) extraction.

**Figure S5** Proton nuclear magnetic resonance ( $^1\text{H}$  NMR) spectra of (a) native extractant **3** and (b) 0.1 M HCl-treated **3**.

**Figure S6**  $^1\text{H}$  NMR spectra of (a) native extractant **4** and (b) 0.1 M HCl-treated **4**.

**Figure S7**  $^1\text{H}$  NMR spectra of (a) native extractant **5** and (b) 0.1 M HCl-treated **5**.

**Figure S8** Comparison of attenuated total reflection Fourier transform infrared (ATR-FTIR) spectra of 0.1 M HCl-treated (a) **3**, (b) **4**, and (c) **5** with those of native extractants (a) **3**, (b) **4**, and (c) **5**.

**Table S1.** The concentrations of metal ions in the leached liquors of automotive catalysts after 25-times dilution.

| <b>Metal ions</b> | <b>[M]<sub>aq,init</sub> (mg/L)</b> |
|-------------------|-------------------------------------|
| Pd                | 36.7                                |
| Pt                | 23.3                                |
| Rh                | 13.7                                |
| La                | 32.9                                |
| Ce                | 231.3                               |
| Y                 | 1.2                                 |
| Zr                | 8.4                                 |
| Ba                | 103.5                               |
| Al                | 111.2                               |

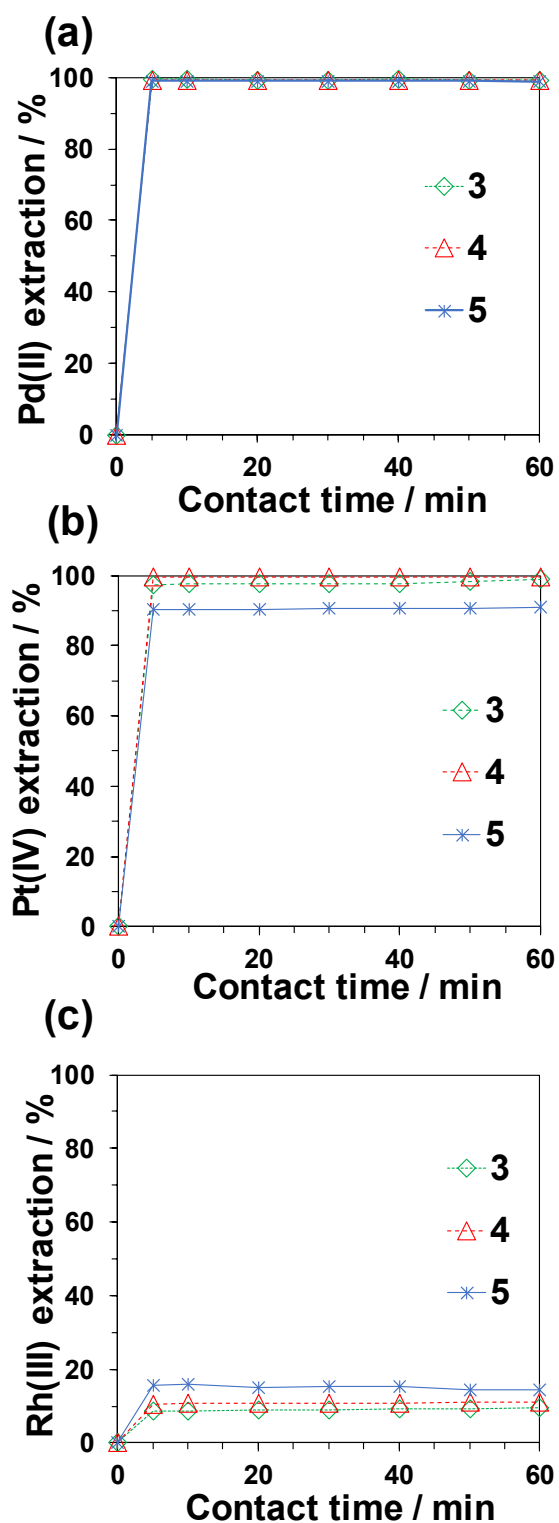

**Figure S1** Effects of contact time on the extraction of a) Pd(II), b) Pt(IV), and c) Rh(III) by extractants **3–5**. Contact time = 0–60 min; [**3–5**] = 1.0 mM; [Pd(II)] = 0.1 mM (10.6 mg/L); [Pt(IV)] = 0.1 mM (19.5 mg/L); [Rh(III)] = 0.1 mM (10.2 mg/L); HCl = 0.1 M.

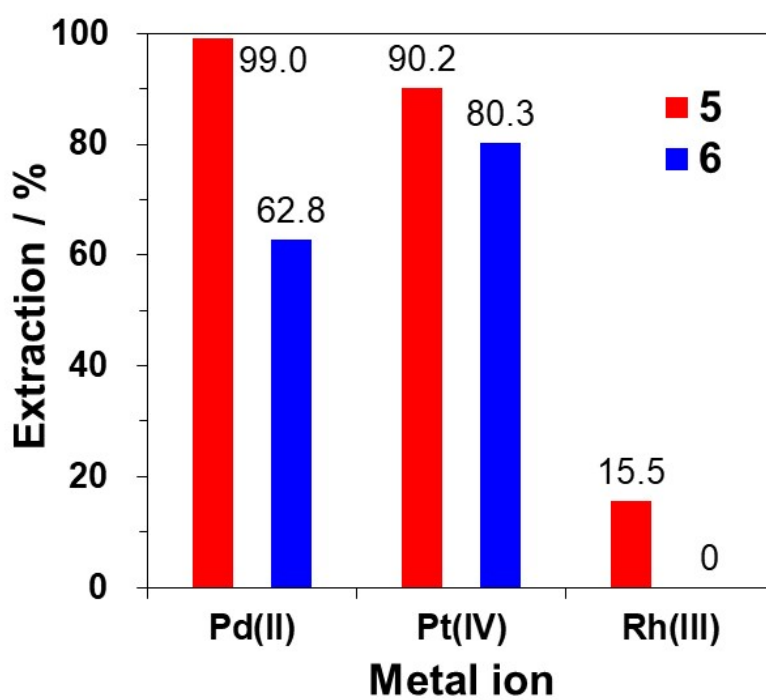

**Figure S2** Comparative study of three PGM extractabilities from each single-component PGM solution using macrocyclic **5** and acyclic **6**.

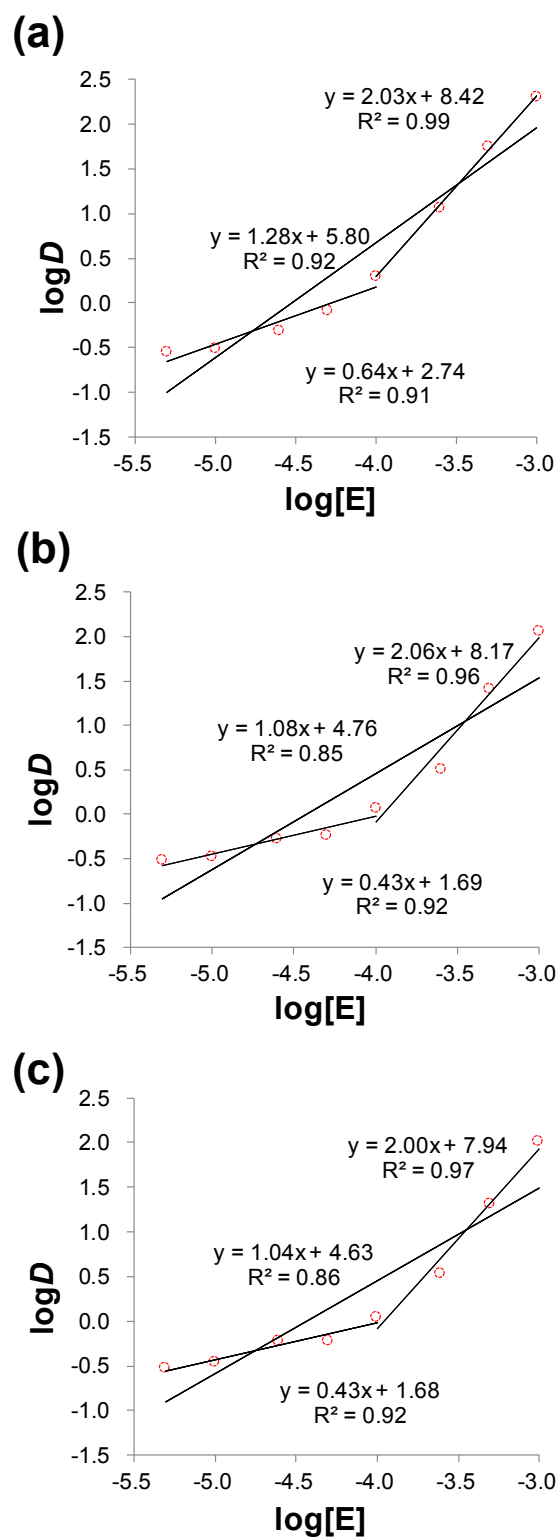

**Figure S3** Log–log plot by varying concentration of extractants **3–5** on Pd(II) extraction. Conditions: [**3–5**] = 0.005–1.0 mM, [HCl] = 0.1 M, [Pd(II)] = 0.1 mM, temperature = 20  $\pm$  1°C, contact time = 60 min.

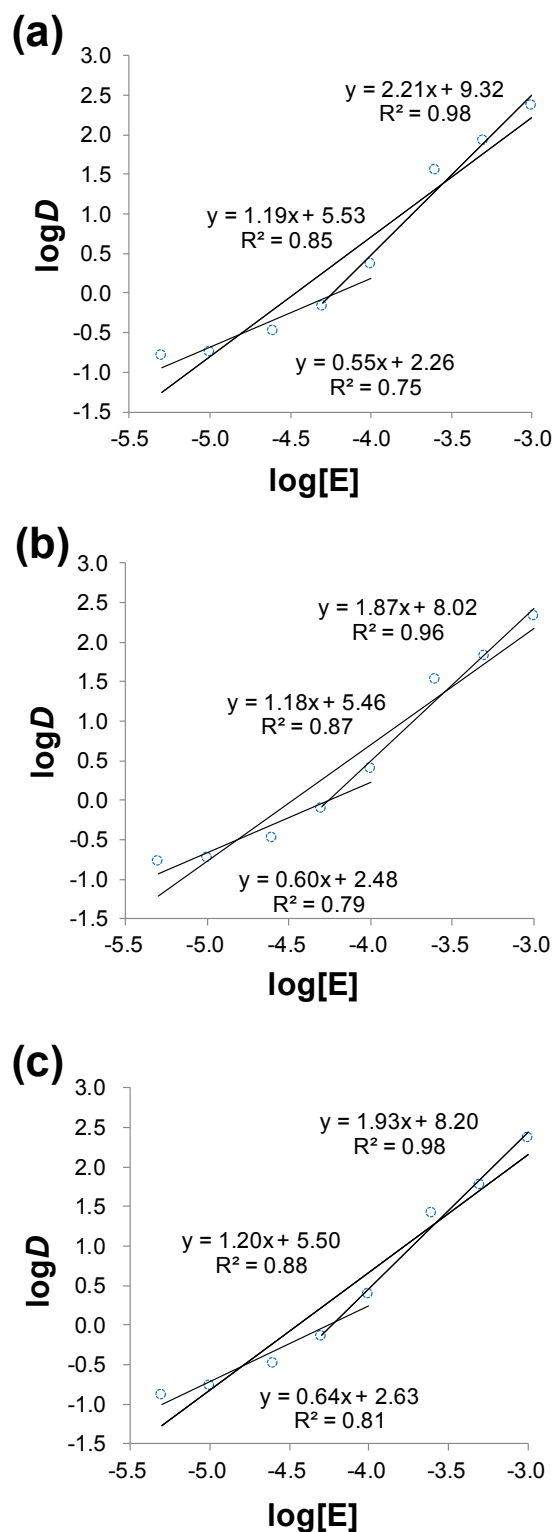

**Figure S4** Log–log plot by varying concentration of extractants **3–5** on Pt(IV) extraction. Conditions: [**3–5**] = 0.005–1.0 mM, [HCl] = 0.1 M, [Pt(IV)] = 0.1 mM, temperature = 20  $\pm$  1  $^{\circ}$ C, contact time = 60 min.

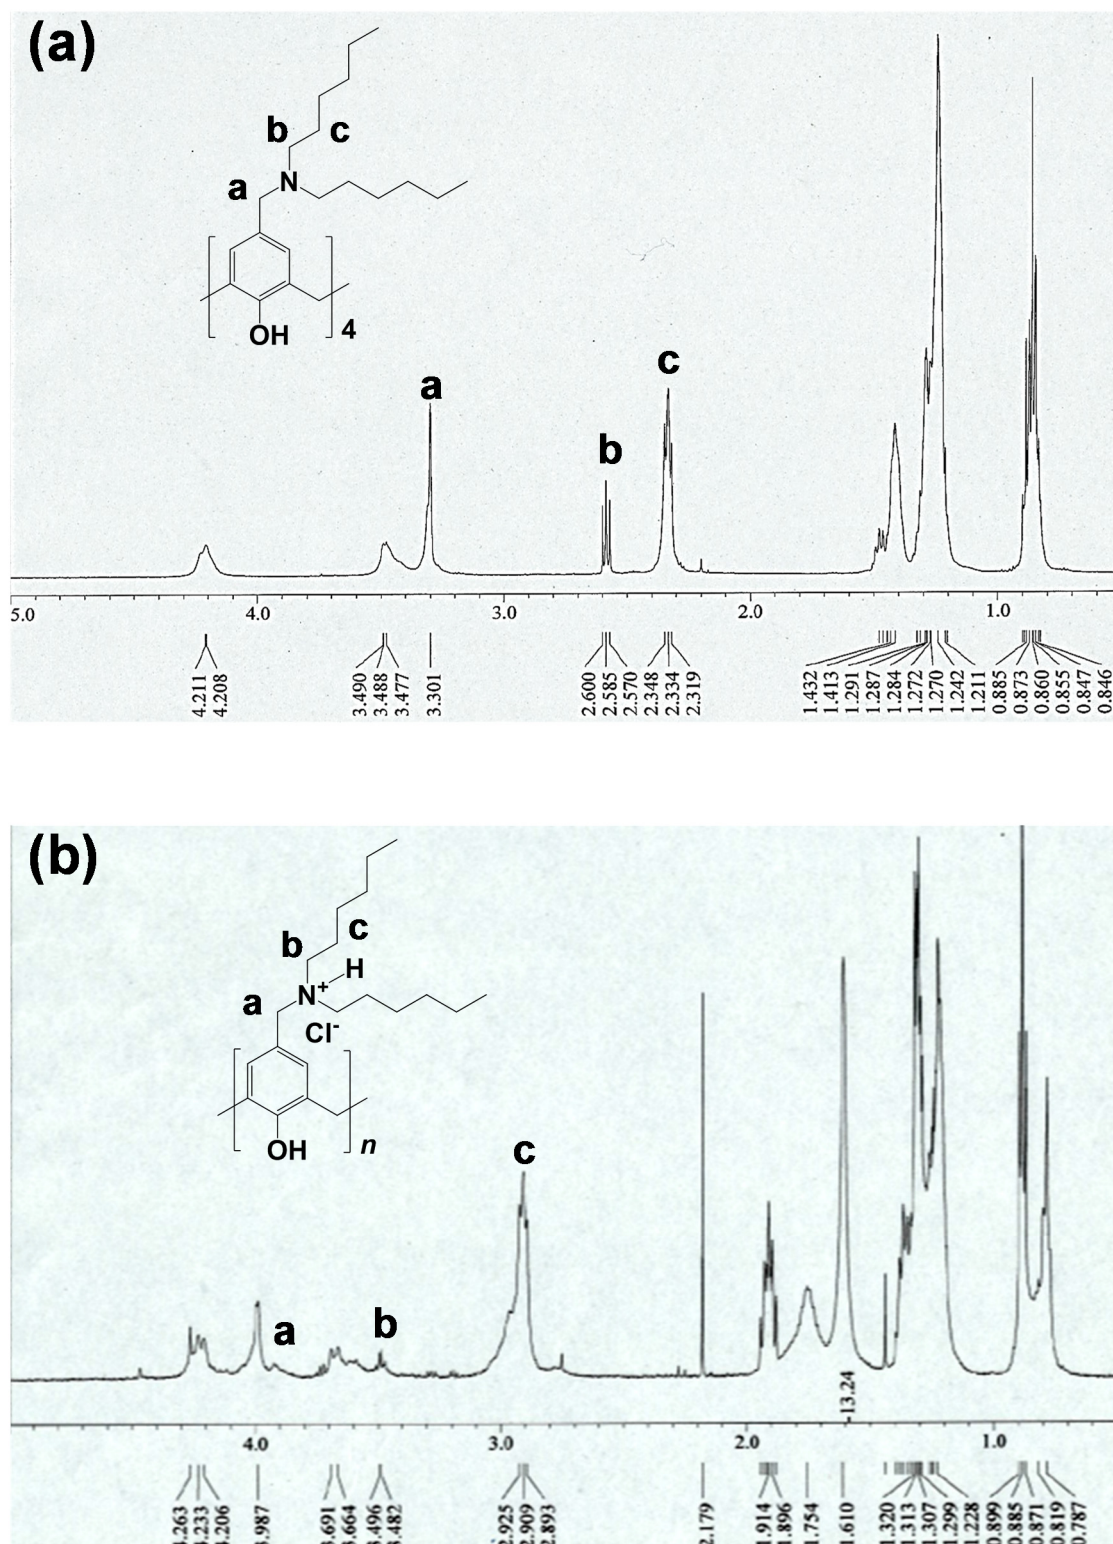

**Figure S5** Proton nuclear magnetic resonance ( $^1\text{H}$  NMR) spectra of (a) native extractant **3** and (b) 0.1 M HCl-treated **3**.



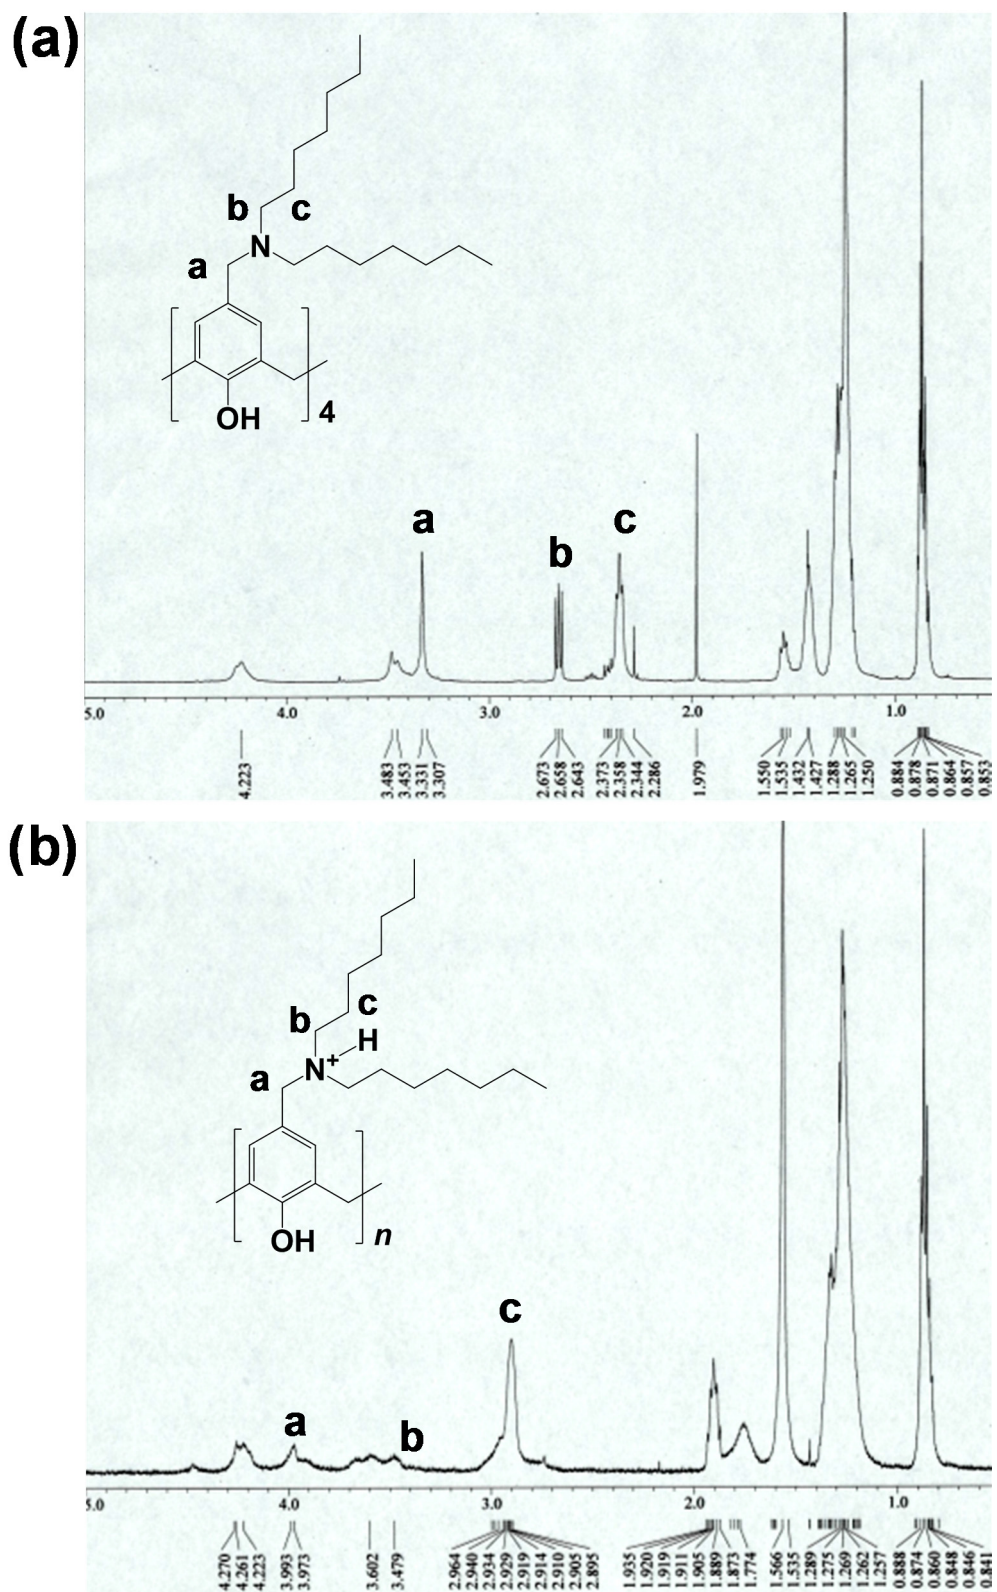

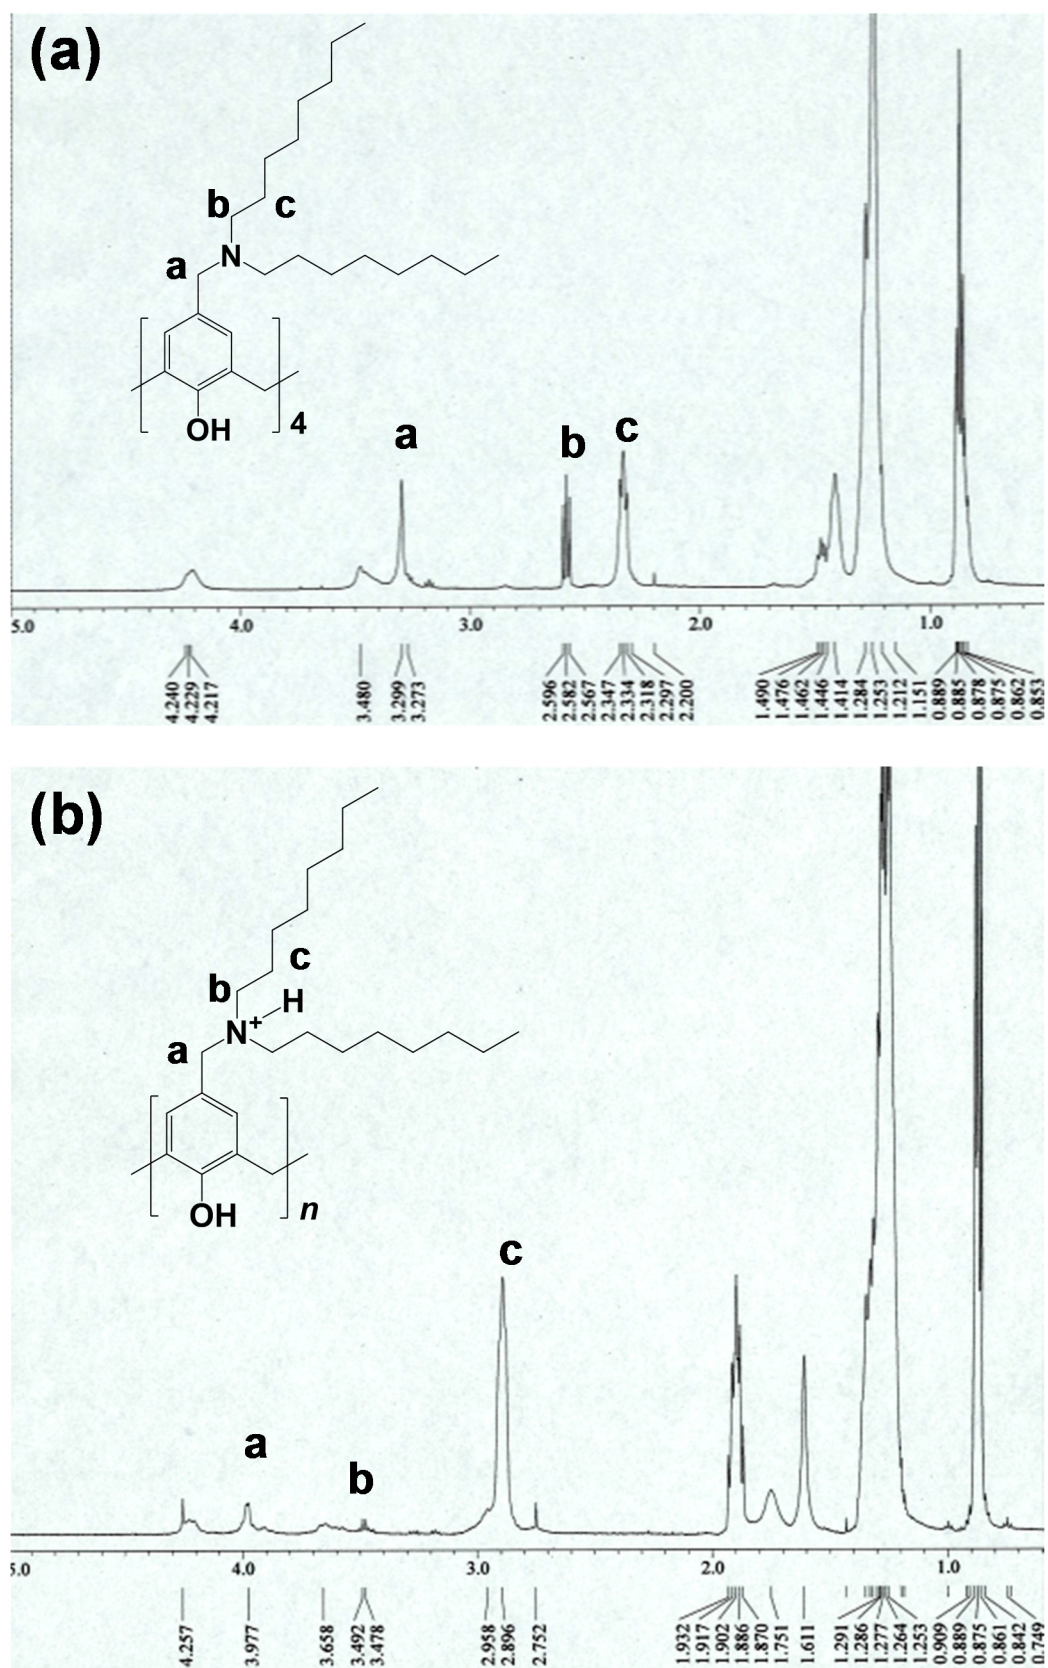

**Figure S7**  $^1\text{H}$  NMR spectra of (a) native extractant **5** and (b) 0.1 M HCl-treated **5**.

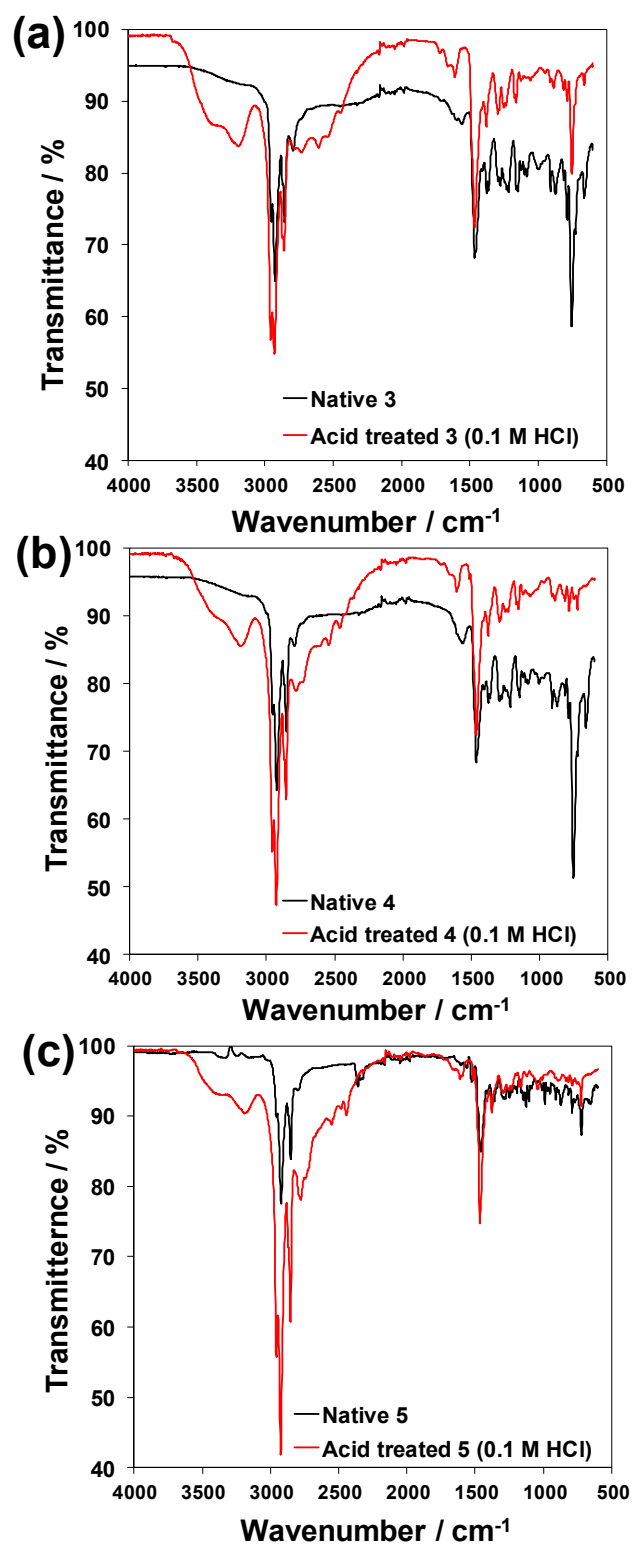

**Figure S8** Comparison of attenuated total reflection Fourier transform infrared (ATR-FTIR) spectra of 0.1 M HCl-treated (a) **3**, (b) **4**, and (c) **5** with those of native extractants (a) **3**, (b) **4**, and (c) **5**.
